# Supplementary material for: Role of interferon regulatory factor 7 in corneal endothelial cells after HSV-1 infection
Source: PubMed Central journal article supplement (PMC8363731; doi:10.1038/s41598-021-95823-9), 2021-08-13
Supplement: 41598_2021_95823_MOESM1_ESM.pdf [file 41598_2021_95823_MOESM1_ESM.pdf]

Supplementary Table 1. List of primer pairs

---

|               |         |                               |
|---------------|---------|-------------------------------|
| IRF3          | forward | ACCAGCCGTGGACCAAGAG           |
|               | reverse | TACCAAGGCCCTGAGGCAC           |
| IRF4          | forward | GACAACGCCTTACCCTTCG           |
|               | reverse | AGGGGTGGCATCATGTAGTT          |
|               | probe   | UPL #3(Roche:04 685 008 001)  |
| IRF7          | forward | TGGTCCTGGTGAAGCTGGAA          |
|               | reverse | GATGTCGTCATAGAGGCTGTTGG       |
| CIITA TypeIII | forward | ACGCCCTGCTGGGTCC              |
|               | reverse | AACTCCATGGTGGCACACTG          |
| IL-2          | forward | AAGAATCCCAAACCTCACCAGGAT      |
|               | reverse | TCTAGACACTGAAGATGTTTCAGTTCTG  |
| IL-6          | forward | GATGAGTACAAAAGTCCTGATCCA      |
|               | reverse | CTGCAGCCACTGGTTCTGT           |
|               | probe   | UPL #40(Roche:04 687 990 001) |
| IL-28         | forward | AGGGCCAAAGATGCCTTAGA          |
|               | reverse | TCCAGAACCTTCAGCGTCAG          |
| IL-29         | forward | GGACGCCTTGGAAGAGTCAC          |

|               |         |                           |
|---------------|---------|---------------------------|
|               | reverse | AGCTGGGAGAGGATGTGGT       |
| ICP0          | forward | AGCGAGTACCCGCCGGCCTG      |
|               | reverse | CAGGTCTCGGTCGCAGGGAAC     |
| $\beta$ 2-    |         |                           |
| microglobulin | forward | TGCTGTCTCCATGTTTGATGTATCT |
|               | reverse | TCTCTGCTCCCCACCTCTAAGT    |
| LMP2          | forward | CGTTGTGATGGGTTCTGATTCC    |
|               | reverse | GACAGCTTGTCAAACACTCGGTT   |
| HLA-A         | forward | AAAAGGAGGGAGTTACACTCAGG   |
|               | reverse | GCTGTGAGGGACACATCAGAG     |
| TAP1          | forward | AGGTACTGCTCTCCATCTAC      |
|               | reverse | AGTGTAAGGGAGTCAACAGA      |
| IFN- $\beta$  | forward | CATTACCTGAAGGCCAAGGA      |
|               | reverse | CAATTGTCCAGTCCCAGAGG      |
| GAPDH         | forward | AGCCACATCGCTCAGACAC       |
|               | reverse | GCCCAATACGACCAAATCC       |

---

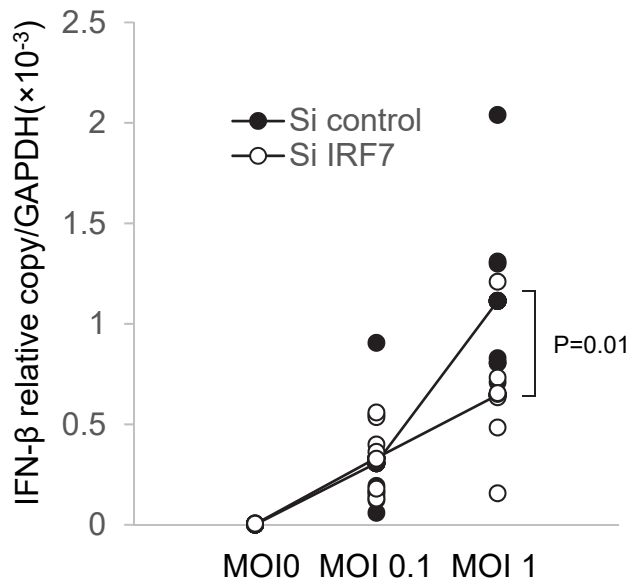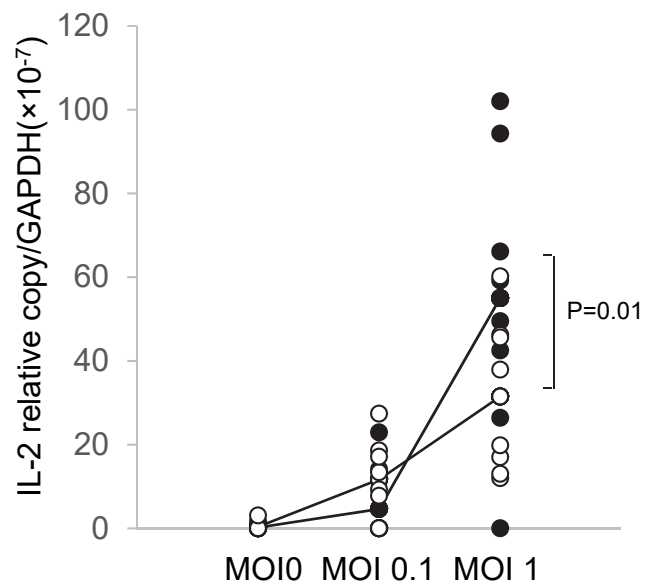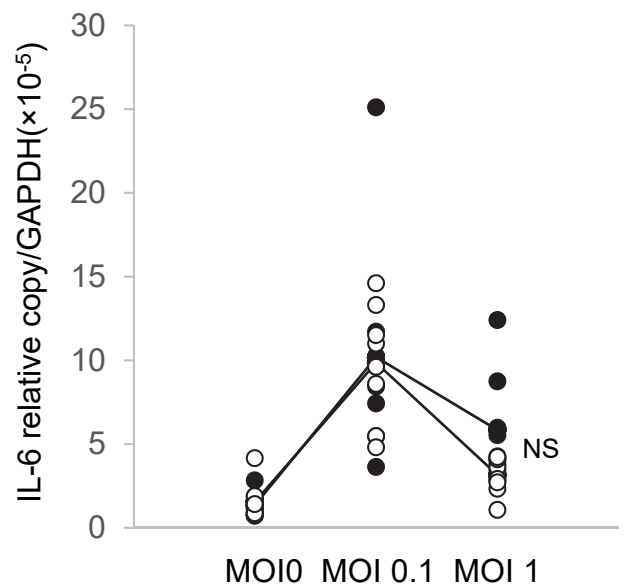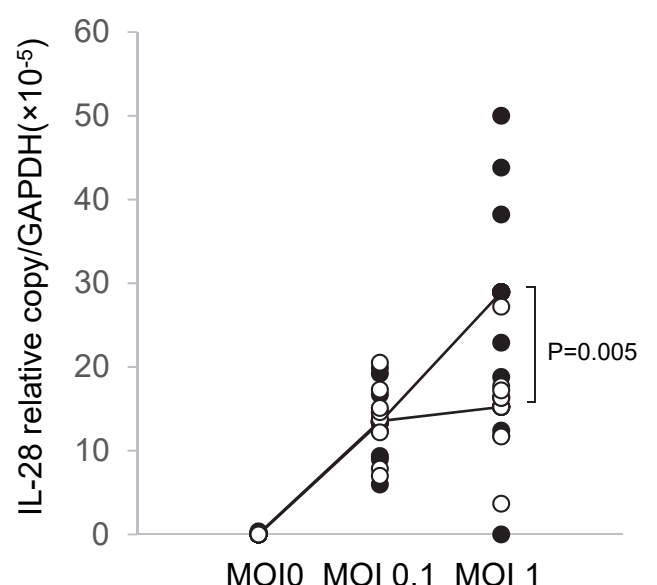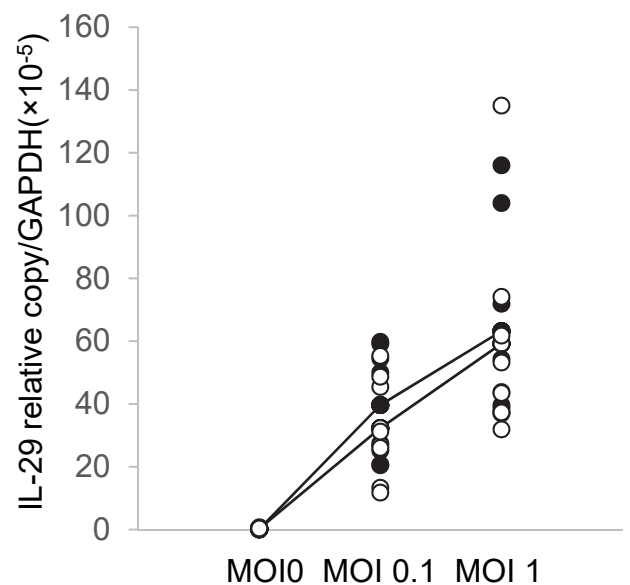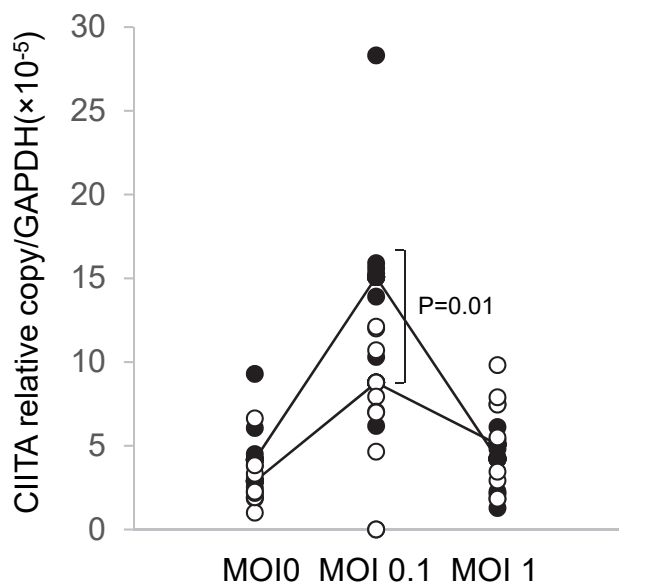

Supplementary Figure 1

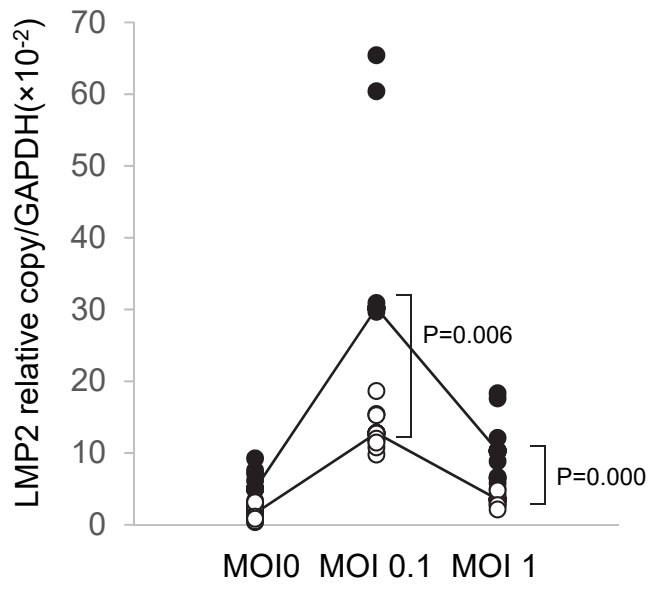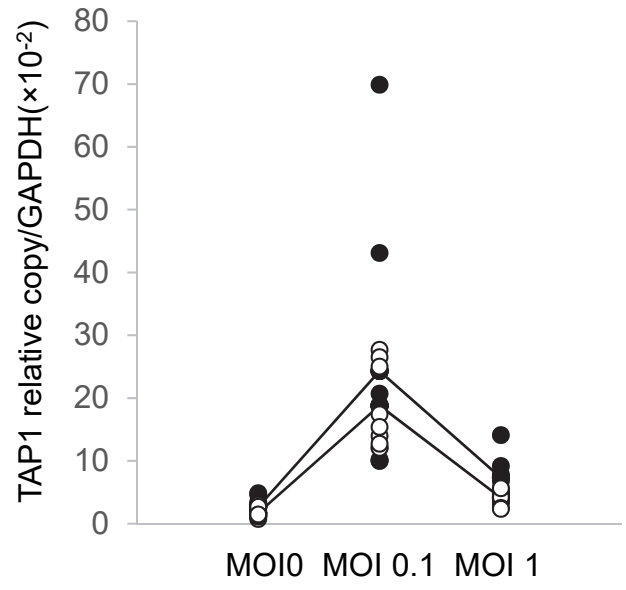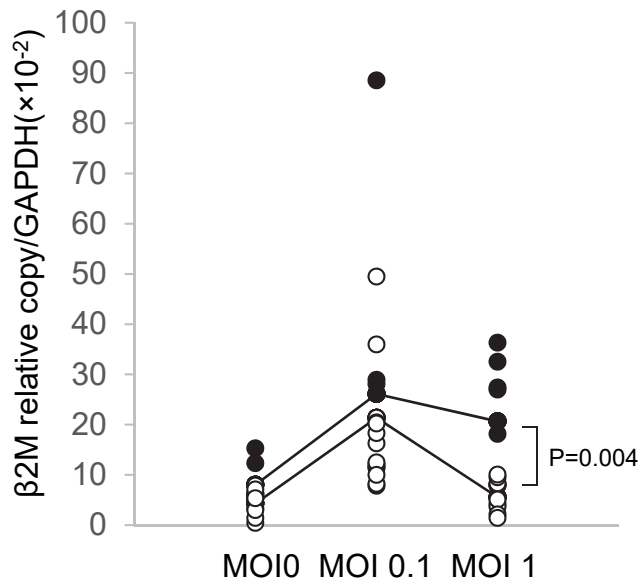

Supplementary Figure 2

**Supplementary Figure 1.** Effect of IRF7 inhibition on HSV-1-induced cytokine mRNA panel. HCEn cells were transfected with siRNA of IRF7 or control siRNA and infected with HSV-1. Cytokine mRNA induction was assessed using real-time RT-PCR at 12 h PI. The induction of IFN- $\beta$  and CIITA is significantly reduced by IRF7 inhibition. N = 8, ANOVA Dunnett's test.

**Supplementary Figure 2.** Effect of IRF7 inhibition on mRNA panel of MHC class I antigen presentation. The expression of the mRNA of LMP2, TAP1, and  $\beta$ 2-microglobulin ( $\beta$ 2M) was assessed using real-time RT-PCR at 12 h PI. The mRNA of LMP2 induction was significantly reduced for IRF7  $\Delta$ DBD HCEn. N = 8, ANOVA Dunnett's test.

IRF7

-->

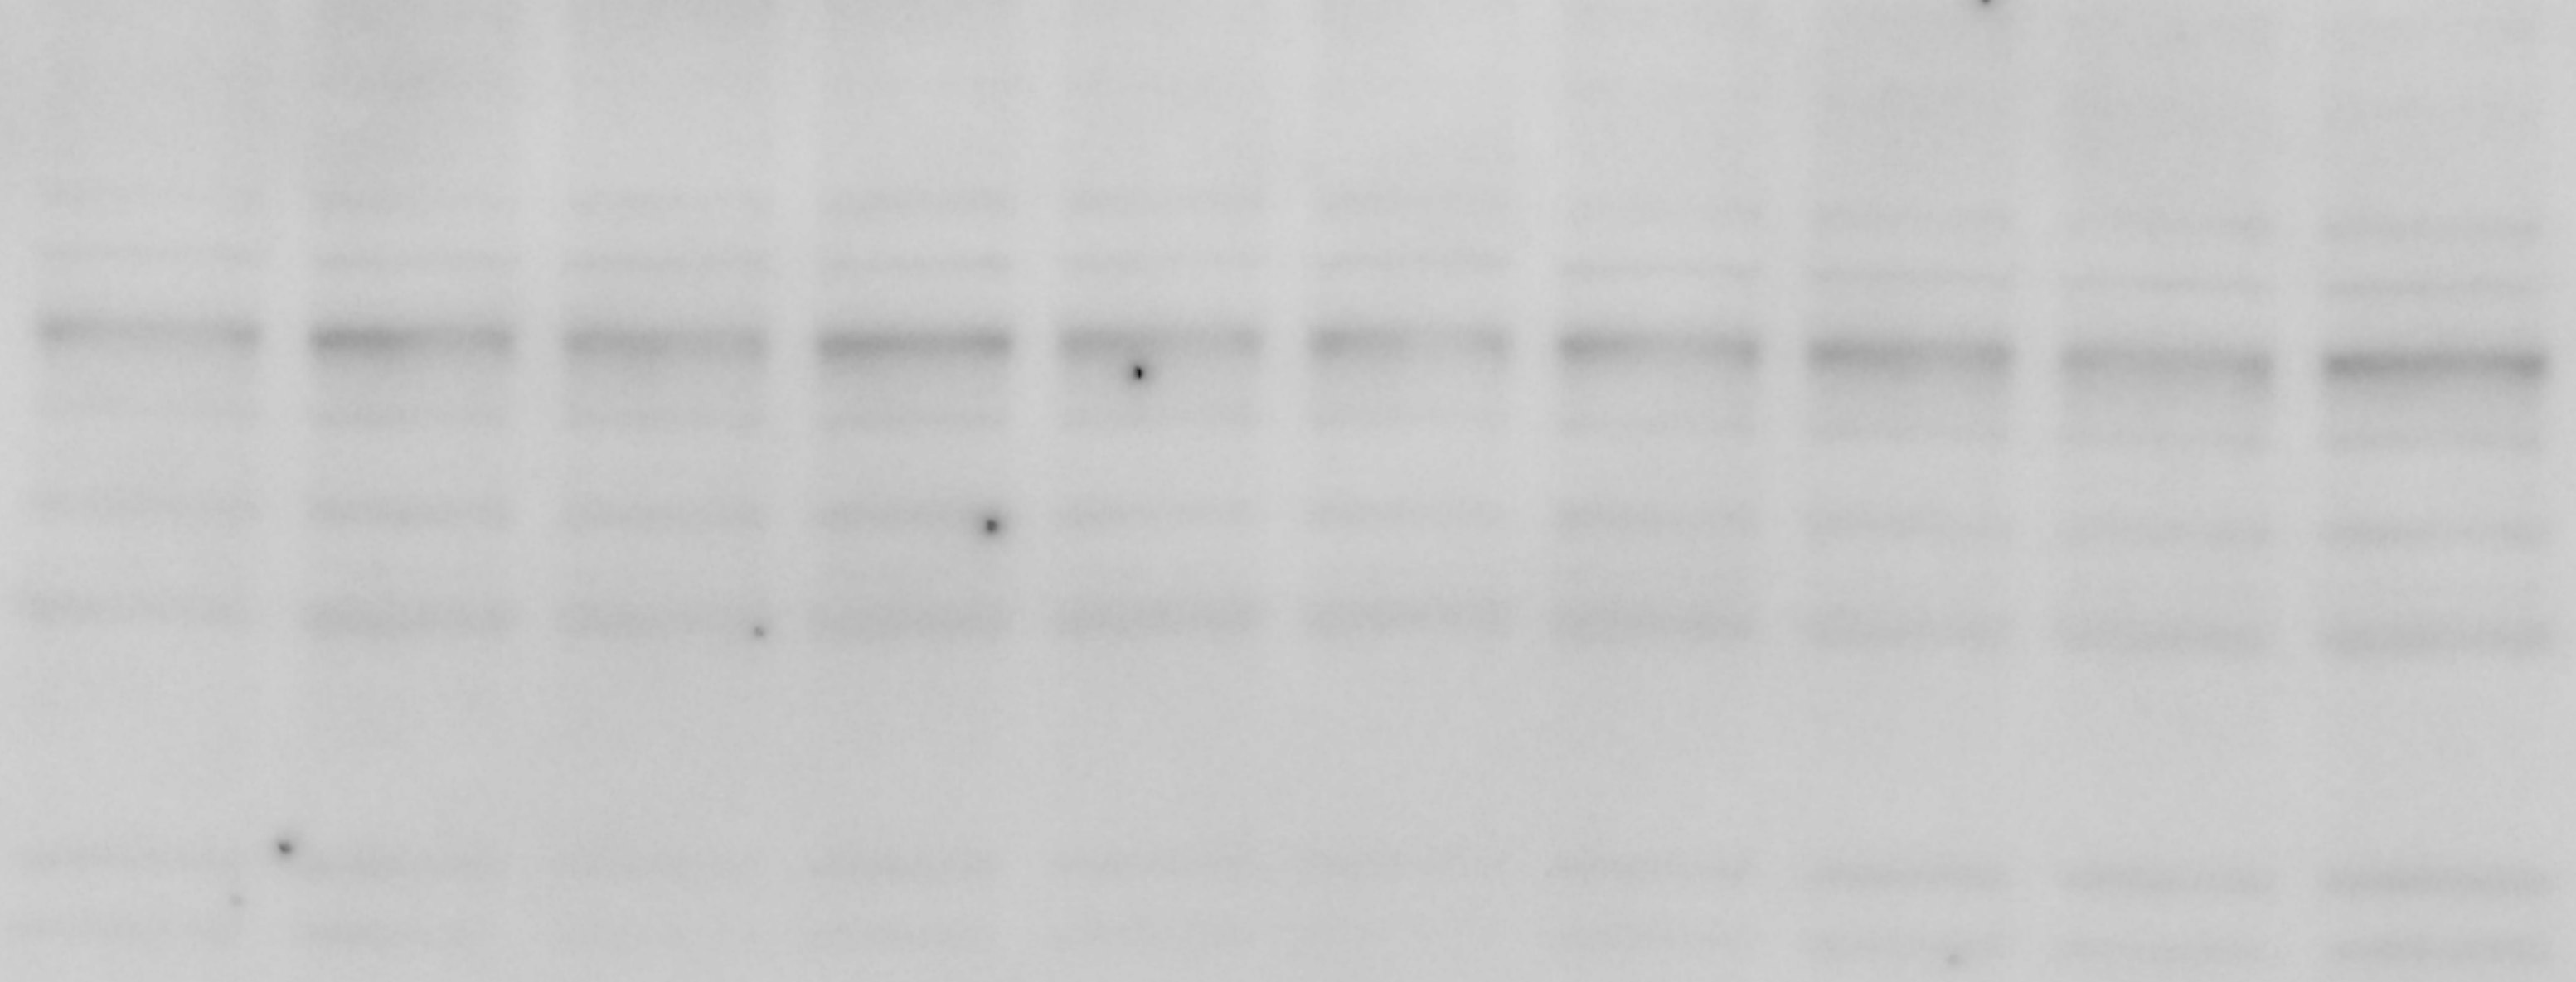

0h

2h

2h

2h

6h

6h

6h

MOI:

0

0

0.1

1

0

0.1

1

Figure 2b Wild type

IRF7

-->

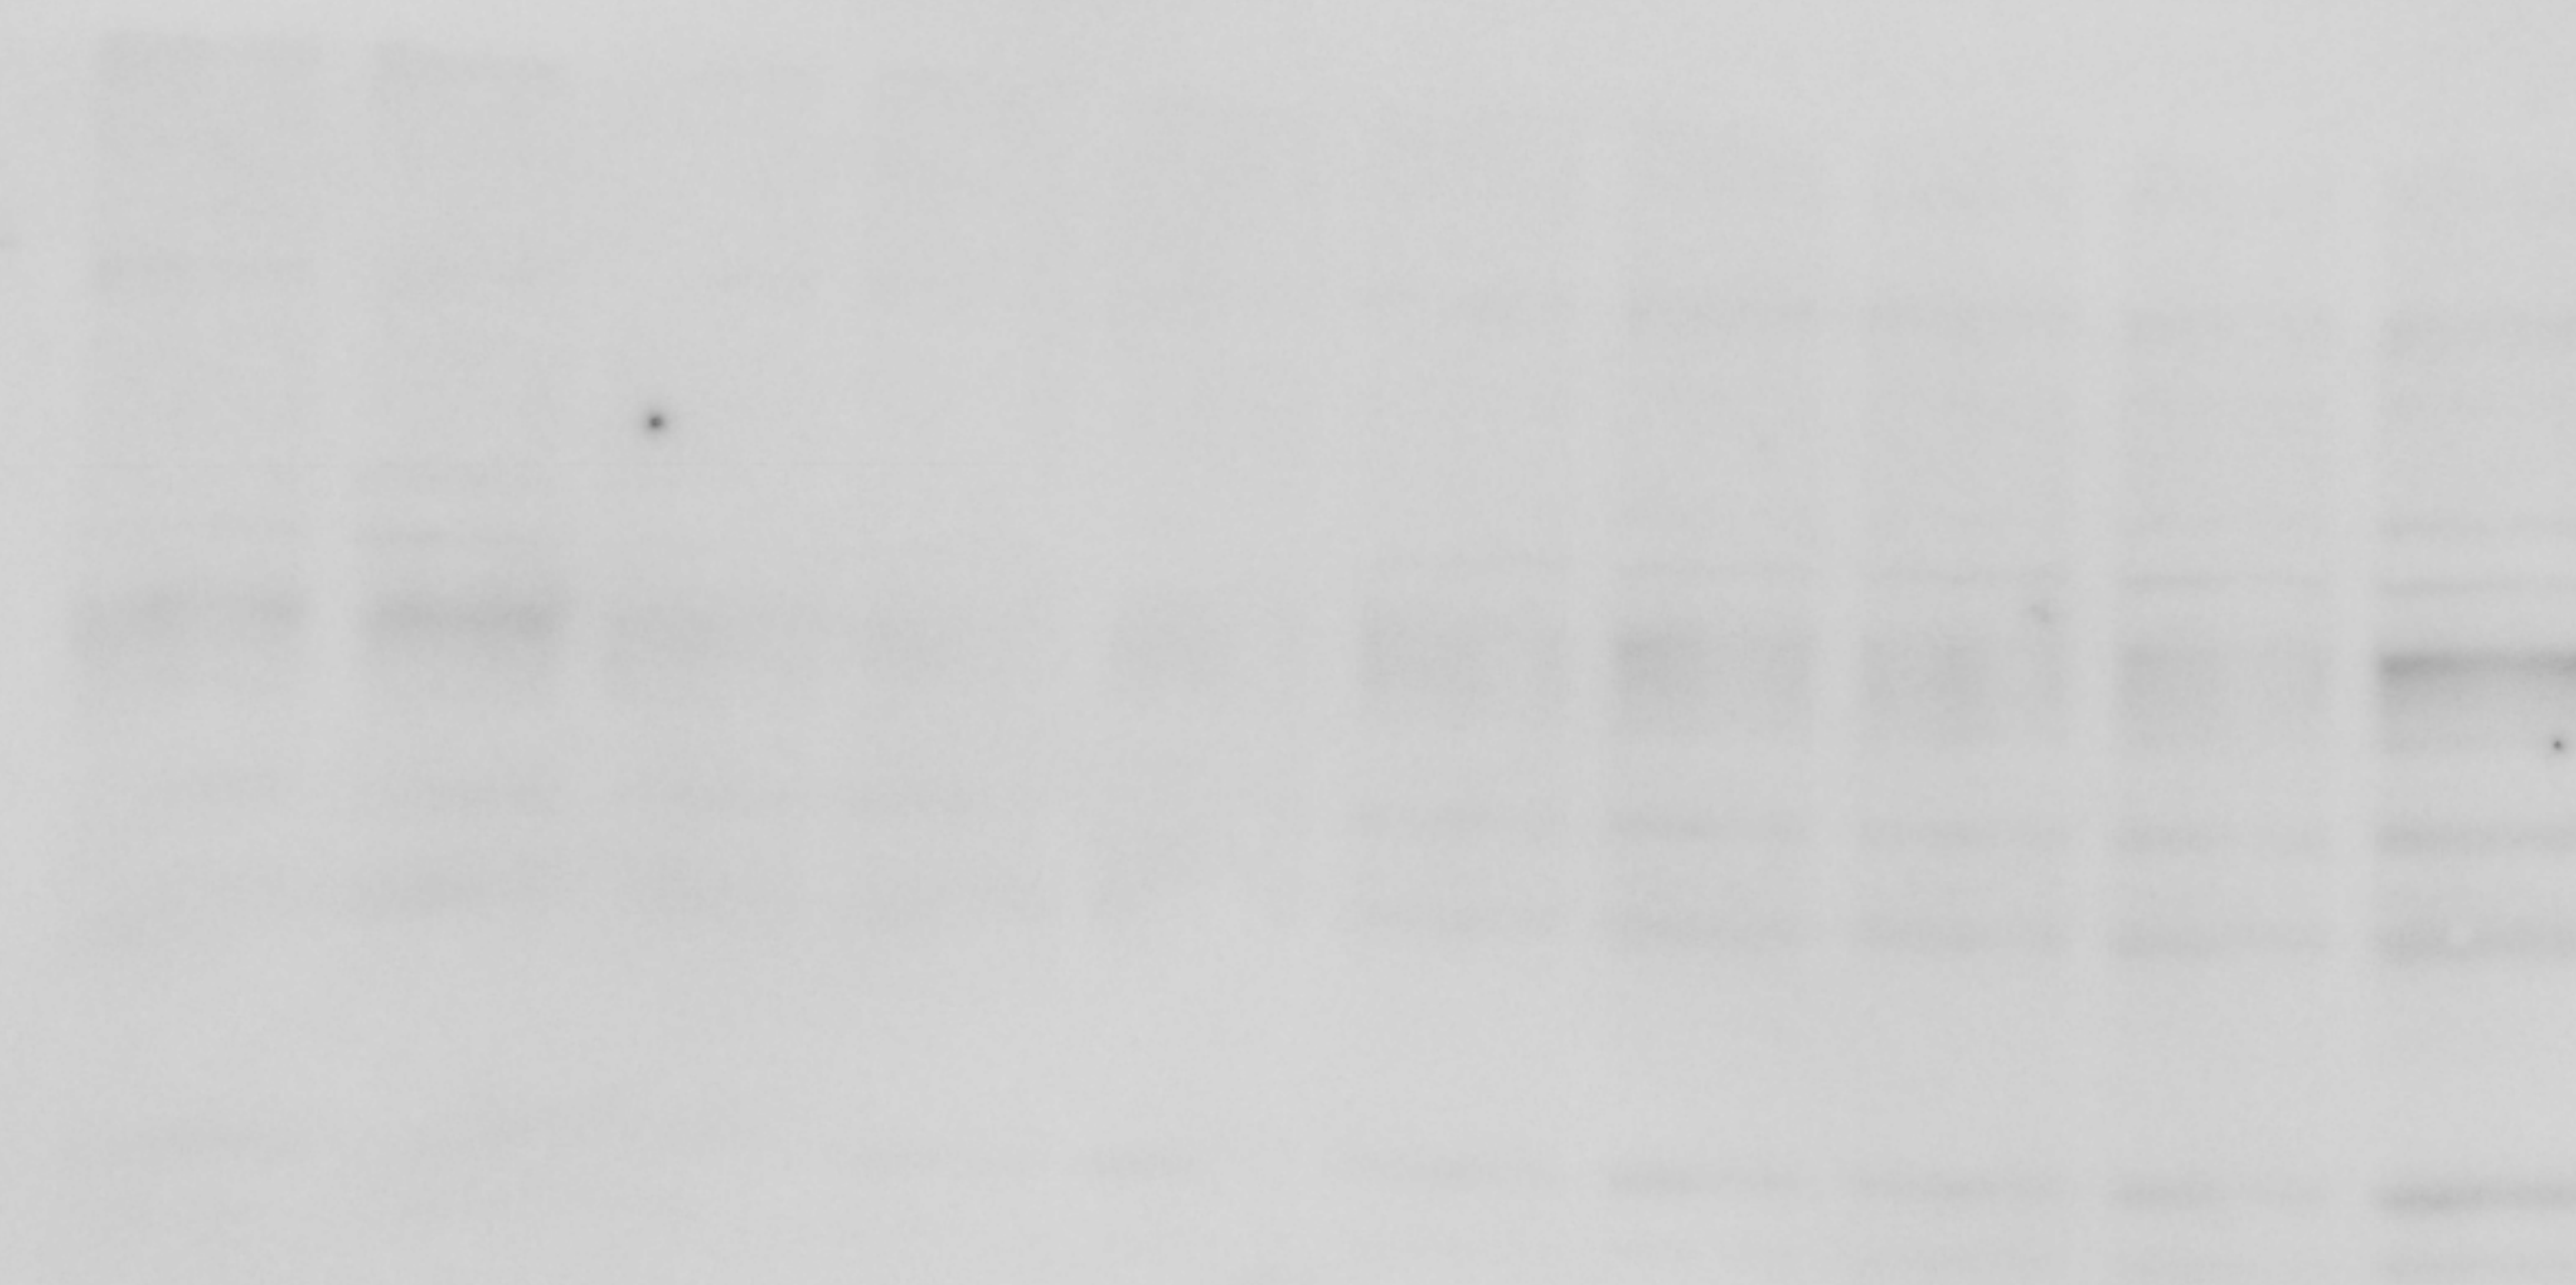

0h

2h

2h

2h

6h

6h

6h

MOI:

0

0

0.1

1

0

0.1

1

Figure 2b IRF7  $\Delta$ DBD

actin-->

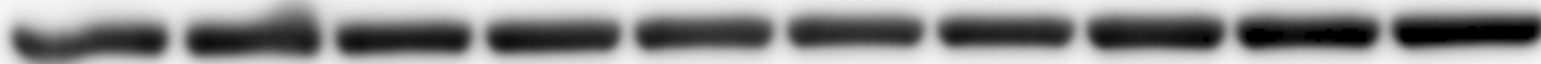

0h

2h

2h

2h

6h

6h

6h

MOI: 0

0

0.1

1

0

0.1

1

Figure 2b IRF7 wild type

actin-->

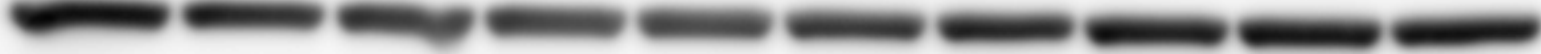

0h

2h

2h

2h

6h

6h

6h

MOI: 0

0

0.1

1

0

0.1

1

Figure 2b IRF7  $\Delta$ DBD

IRF7-->

Plasmid

0

0.5

1.0

Figure 2d

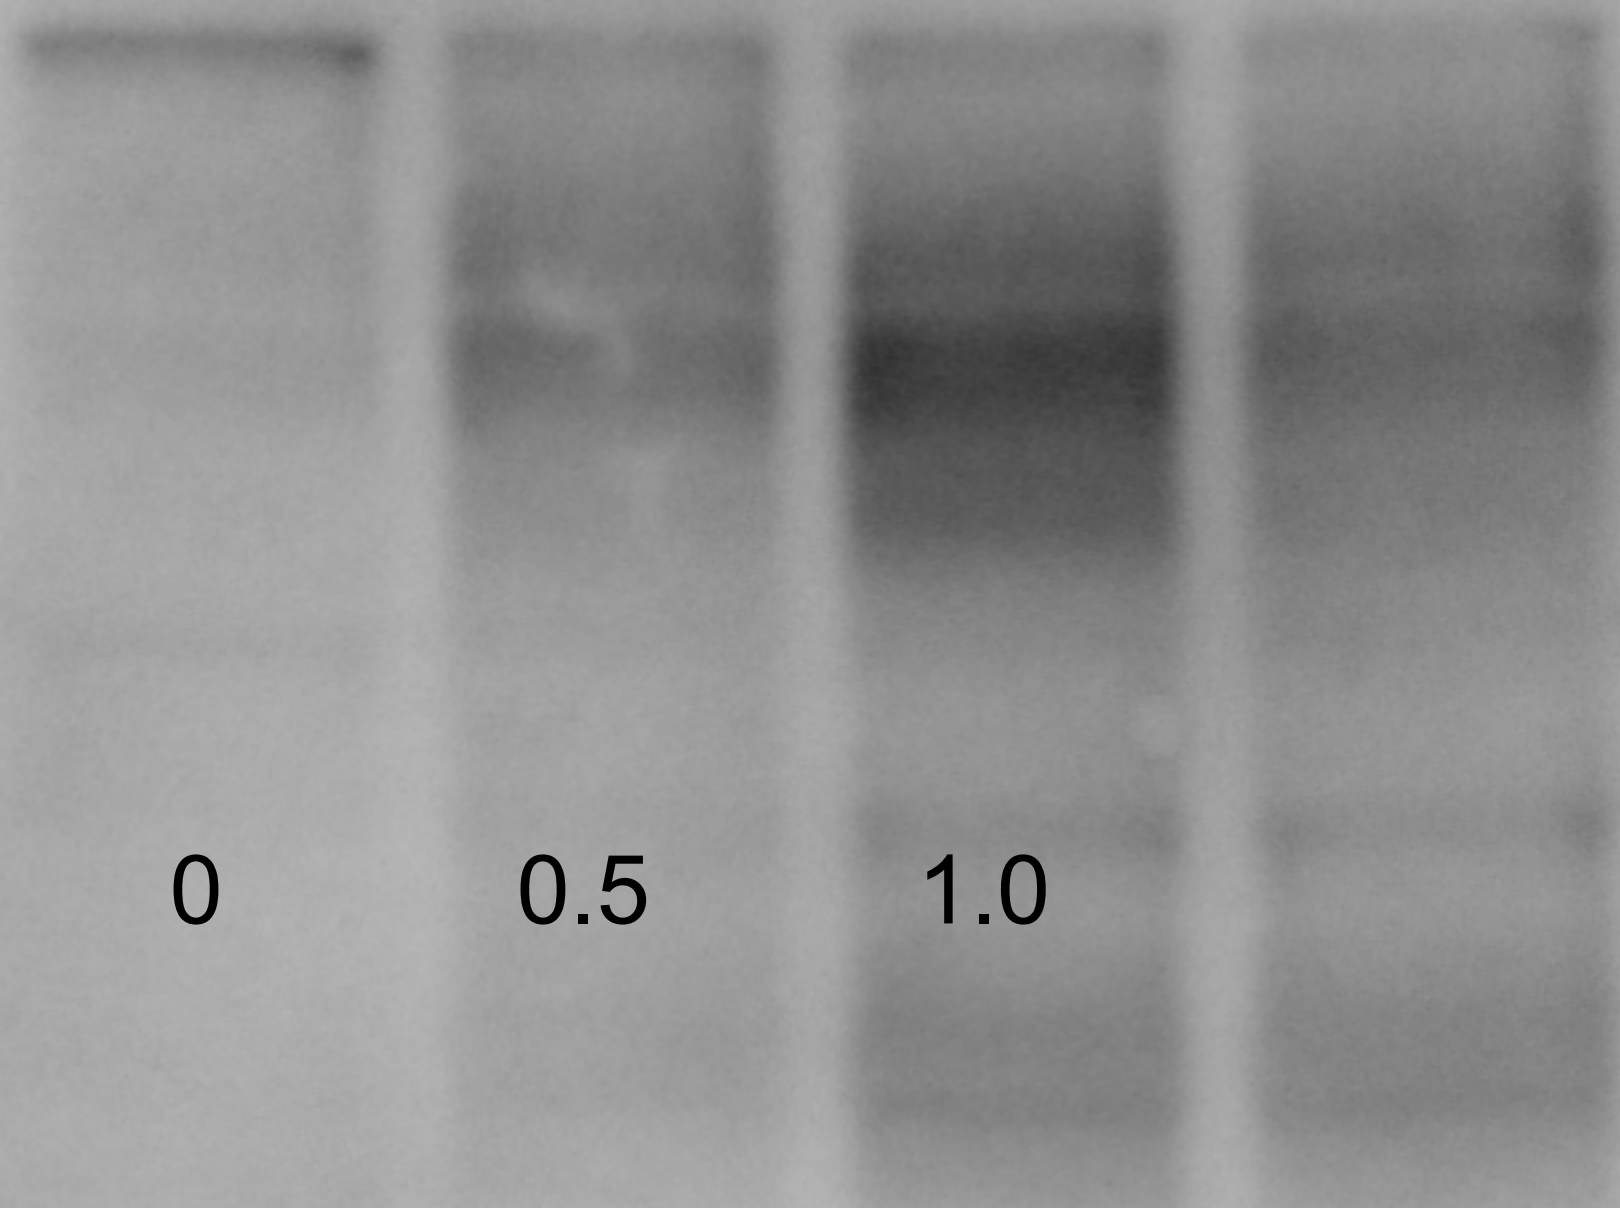



actin-->

Plasmid

0

0.5

1.0

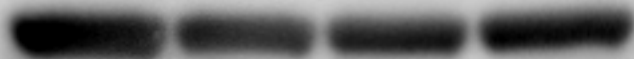

Figure 2d
